# Supplementary material for: Rosmarinic Acid Exhibits a Lipid-Lowering Effect by Modulating the Expression of Reverse Cholesterol Transporters and Lipid Metabolism in High-Fat Diet-Fed Mice
Source: MDPI journal article supplement (doi:10.3390/biom11101470), 2021-10-06
Supplement: s1 [file s1]

## <Supplementary Materials: Figure S1>

Raw images for western blotting

Figure 3A

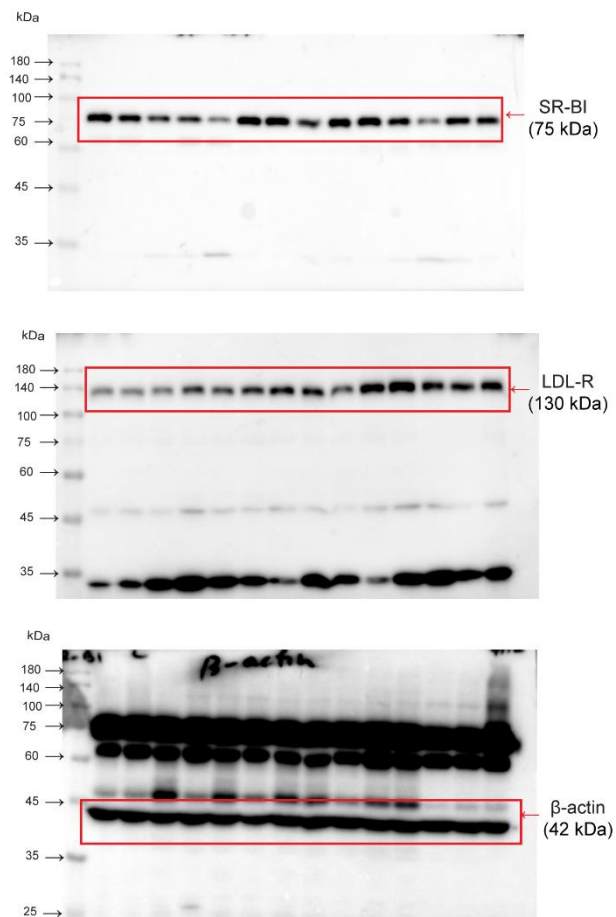

Raw images for western blotting

Figure 4A

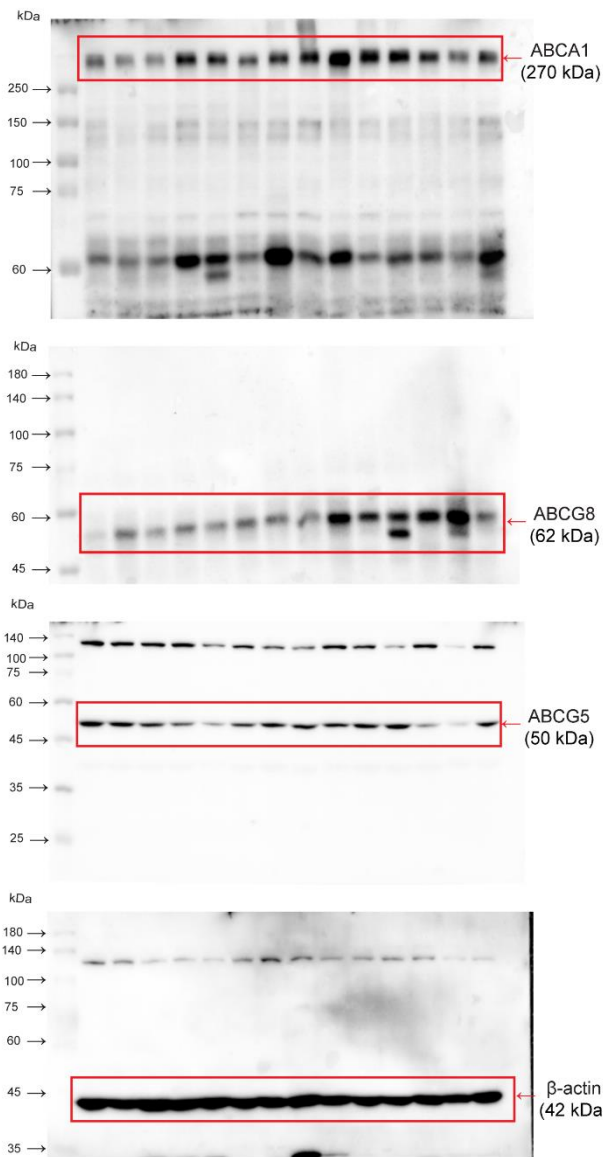

Figure 4E

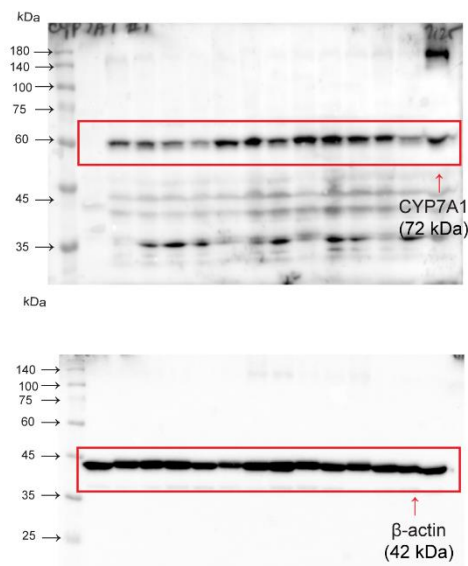

## Raw images for western blotting

Figure 5A

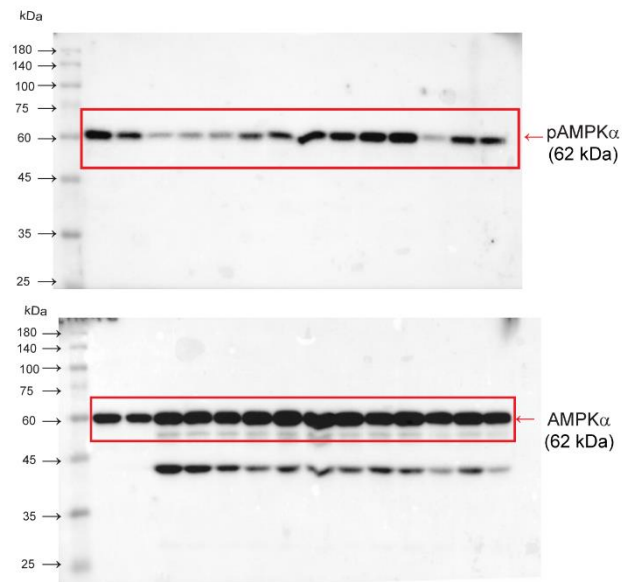

Figure 5C

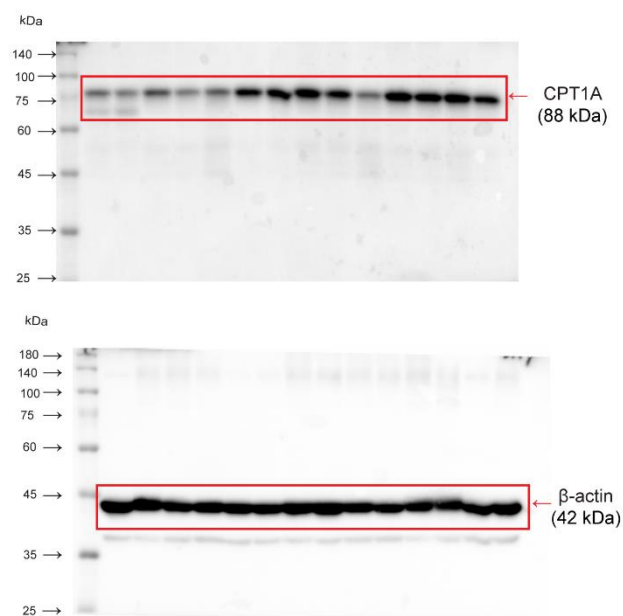

## <Supplementary Materials: Tables>

**<Table S1: Intensity ratios of Western blots for Figure 3B>**

|       | Group          | SR-BI     | $\beta$ -actin | SR-BI/ $\beta$ -actin | fold of control |
|-------|----------------|-----------|----------------|-----------------------|-----------------|
| SR-BI | Ave. of ND-1&2 |           |                | 0.714029795           | 1               |
|       | ND-1           | 12695.355 | 17467.983      | 0.72677853            | 1.017854626     |
|       | ND-2           | 11165.891 | 15922.134      | 0.701281059           | 0.982145374     |
|       | HFD-1          | 5714.77   | 17193.184      | 0.332385787           | 0.465506888     |
|       | HFD-2          | 8941.598  | 19543.719      | 0.457517732           | 0.6407544       |
|       | HFD-3          | 2076.527  | 17095.012      | 0.12146976            | 0.170118615     |
|       | HFD + RA 50-1  | 13535.184 | 16587.548      | 0.815984617           | 1.14278791      |
|       | HFD + RA 50-2  | 15441.477 | 16880.255      | 0.914765624           | 1.281130887     |
|       | HFD + RA 50-3  | 11908.598 | 20094.79       | 0.592621172           | 0.829967008     |
|       | HFD + RA 100-1 | 18837.719 | 19432.205      | 0.969407177           | 1.35765648      |
|       | HFD + RA 100-2 | 14024.012 | 16795.205      | 0.835000942           | 1.169420308     |
|       | HFD + RA 100-3 | 18371.305 | 19065.569      | 0.963585456           | 1.349503149     |
|       | HFD + ME 100-1 | 17381.234 | 21167.447      | 0.82113039            | 1.149994574     |
|       | HFD + ME 100-2 | 13915.184 | 18440.962      | 0.754580157           | 1.056790855     |
|       | HFD + ME 100-3 | 10439.648 | 20291.154      | 0.514492571           | 0.720547763     |
|       |                |           |                |                       |                 |
|       | Ave. of ND-3&4 |           |                | 0.746027406           | 1               |
|       | ND-3           | 15633.477 | 19167.79       | 0.815611868           | 1.093273331     |
|       | ND-4           | 11821.477 | 17475.941      | 0.676442945           | 0.906726669     |
|       | HFD-4          | 7331.062  | 23714.184      | 0.309142495           | 0.414384903     |
|       | HFD-5          | 8336.184  | 20079.426      | 0.415160473           | 0.556494935     |
|       | HFD-6          | 2843.527  | 20444.962      | 0.139082039           | 0.1864302       |
|       | HFD + RA 50-4  | 16507.598 | 18602.77       | 0.887373117           | 1.189464501     |
|       | HFD + RA 50-5  | 16619.184 | 19016.255      | 0.873946211           | 1.171466629     |
|       | HFD + RA 50-6  | 9163.355  | 22617.154      | 0.405150666           | 0.543077456     |

|  |                       |           |           |             |             |
|--|-----------------------|-----------|-----------|-------------|-------------|
|  | <b>HFD + RA 100-4</b> | 15682.355 | 17561.79  | 0.892981581 | 1.196982274 |
|  | <b>HFD + RA 100-5</b> | 16511.184 | 15957.497 | 1.03469761  | 1.386943161 |
|  | <b>HFD + RA 100-6</b> | 11906.77  | 13197.134 | 0.902223922 | 1.209371016 |
|  | <b>HFD + ME 100-4</b> | 11779.648 | 17875.962 | 0.658965822 | 0.883299751 |
|  | <b>HFD + ME 100-5</b> | 13218.184 | 12519.426 | 1.055813901 | 1.415248142 |
|  | <b>HFD + ME 100-6</b> | 11170.062 | 16125.205 | 0.692708217 | 0.928529181 |

**<Table S2: Summary of relative protein levels of Figure 3B>**

| <b>SR-BI/<math>\beta</math>-actin</b> | <b>ND</b>      | <b>HFD</b>    | <b>HFD + RA 50</b> | <b>HFD+ RA 100</b> | <b>HFD + ME 100</b> |
|---------------------------------------|----------------|---------------|--------------------|--------------------|---------------------|
| <b>n=1</b>                            | 1.017854626    | 0.465506888   | 1.14278791         | 1.35765648         | 1.149994574         |
| <b>n=2</b>                            | 0.982145374    | 0.6407544     | 1.281130887        | 1.169420308        | 1.056790855         |
| <b>n=3</b>                            | 1.093273331    | 0.170118615   | 0.829967008        | 1.349503149        | 0.720547763         |
| <b>n=4</b>                            | 0.906726669    | 0.414384903   | 1.189464501        | 1.196982274        | 0.883299751         |
| <b>n=5</b>                            |                | 0.556494935   | 1.171466629        | 1.386943161        | 1.415248142         |
| <b>n=6</b>                            |                | 0.1864302     | 0.543077456        | 1.209371016        | 0.928529181         |
| <b>Mean</b>                           | <b>1</b>       | <b>0.4056</b> | <b>1.026</b>       | <b>1.278</b>       | <b>1.026</b>        |
| <b>Std. Deviation</b>                 | <b>0.07754</b> | <b>0.1925</b> | <b>0.2822</b>      | <b>0.09632</b>     | <b>0.2412</b>       |

**<Table S3: Intensity ratios of Western blots for Figure 3C>**

|       | Group                     | LDL-R     | $\beta$ -actin | LDL-R/ $\beta$ -actin | fold of control |
|-------|---------------------------|-----------|----------------|-----------------------|-----------------|
| LDL-R | <b>Ave. of ND-1&amp;2</b> |           |                | 0.345183403           | 1               |
|       | <b>ND-1</b>               | 7585.305  | 18421.548      | 0.411762627           | 1.192880723     |
|       | <b>ND-2</b>               | 5354.891  | 19220.426      | 0.278604179           | 0.807119277     |
|       | <b>HFD-1</b>              | 5403.891  | 19011.134      | 0.284248746           | 0.823471649     |
|       | <b>HFD-2</b>              | 3652.305  | 18172.255      | 0.200982487           | 0.582248408     |
|       | <b>HFD-3</b>              | 7464.426  | 17969.134      | 0.415402657           | 1.203425927     |
|       | <b>HFD + RA 50-1</b>      | 9279.134  | 15242.548      | 0.60876528            | 1.763599509     |
|       | <b>HFD + RA 50-2</b>      | 6595.012  | 19499.033      | 0.338222516           | 0.979834236     |
|       | <b>HFD + RA 50-3</b>      | 9141.012  | 18938.326      | 0.48267265            | 1.398307816     |
|       | <b>HFD + RA 100-1</b>     | 7067.648  | 19260.255      | 0.366955058           | 1.063072718     |
|       | <b>HFD + RA 100-2</b>     | 13403.305 | 19461.841      | 0.688696665           | 1.995161586     |
|       | <b>HFD + RA 100-3</b>     | 13333.719 | 19663.326      | 0.678100897           | 1.964465532     |
|       | <b>HFD + ME 100-1</b>     | 16942.548 | 18038.74       | 0.939231232           | 2.720962898     |
|       | <b>HFD + ME 100-2</b>     | 11409.426 | 17688.912      | 0.645004396           | 1.868584615     |
|       | <b>HFD + ME 100-3</b>     | 18666.497 | 17915.012      | 1.041947223           | 3.018532218     |
|       |                           |           |                |                       |                 |
|       | <b>Ave. of ND-3&amp;4</b> |           |                | 0.367415404           | 1               |
|       | <b>ND-3</b>               | 5595.941  | 16122.305      | 0.347093111           | 0.944688512     |
|       | <b>ND-4</b>               | 6136.134  | 15825.477      | 0.387737697           | 1.055311488     |
|       | <b>HFD-4</b>              | 5906.598  | 16644.891      | 0.354859518           | 0.965826458     |
|       | <b>HFD-5</b>              | 10567.134 | 17516.598      | 0.603264058           | 1.641912811     |
|       | <b>HFD-6</b>              | 9770.548  | 18280.598      | 0.534476389           | 1.454692381     |
|       | <b>HFD + RA 50-4</b>      | 11569.255 | 18159.598      | 0.637087616           | 1.733970894     |
|       | <b>HFD + RA 50-5</b>      | 14532.669 | 17073.305      | 0.85119249            | 2.316703332     |
|       | <b>HFD + RA 50-6</b>      | 12882.305 | 19669.012      | 0.654954352           | 1.782599055     |

|  |                       |           |           |             |             |
|--|-----------------------|-----------|-----------|-------------|-------------|
|  | <b>HFD + RA 100-4</b> | 9283.012  | 10217.598 | 0.908531731 | 2.472764402 |
|  | <b>HFD + RA 100-5</b> | 17920.305 | 16607.891 | 1.07902352  | 2.936794452 |
|  | <b>HFD + RA 100-6</b> | 21180.255 | 18046.134 | 1.17367271  | 3.19440257  |
|  | <b>HFD + ME 100-4</b> | 14242.719 | 16762.619 | 0.849671462 | 2.312563528 |
|  | <b>HFD + ME 100-5</b> | 14025.548 | 15660.033 | 0.895626976 | 2.437641336 |
|  | <b>HFD + ME 100-6</b> | 14280.113 | 17813.619 | 0.801640195 | 2.181836107 |

**<Table S4: Summary of relative protein levels of Figure 3C>**

| <b>LDL-R/<math>\beta</math>-actin</b> | <b>ND</b>     | <b>HFD</b>   | <b>HFD + RA 50</b> | <b>HFD+ RA 100</b> | <b>HFD + ME 100</b> |
|---------------------------------------|---------------|--------------|--------------------|--------------------|---------------------|
| n=1                                   | 1.192880723   | 0.823472     | 1.7636             | 1.063073           | 2.720963            |
| n=2                                   | 0.807119277   | 0.582248     | 0.979834           | 1.995162           | 1.868585            |
| n=3                                   | 1.055311      | 1.203426     | 1.398308           | 1.964466           | 3.018532            |
| n=4                                   | 0.965826      | 0.965826     | 1.733971           | 2.472764           | 2.312564            |
| n=5                                   |               | 1.641913     | 2.316703           | 2.936794           | 2.437641            |
| n=6                                   |               | 1.454692     | 1.782599           | 3.194403           | 2.181836            |
| <b>Mean</b>                           | <b>1.005</b>  | <b>1.112</b> | <b>1.663</b>       | <b>2.271</b>       | <b>2.423</b>        |
| <b>Std. Deviation</b>                 | <b>0.1618</b> | <b>0.398</b> | <b>0.4458</b>      | <b>0.7702</b>      | <b>0.4053</b>       |

**<Table S5: Intensity ratios of Western blots for Figure 4B>**

|       | Group          | ABCA1     | $\beta$ -actin | ABCA1 $\beta$ -actin | fold of control |
|-------|----------------|-----------|----------------|----------------------|-----------------|
| ABCA1 | Ave. of ND-1&2 |           |                | 0.165389001          | 1               |
|       | ND-1           | 2827.648  | 13350.891      | 0.211794703          | 1.280585177     |
|       | ND-2           | 1746.627  | 14679.598      | 0.118983299          | 0.719414823     |
|       | HFD-1          | 2888.941  | 13429.477      | 0.215119397          | 1.300687444     |
|       | HFD-2          | 8354.891  | 19223.77       | 0.434612514          | 2.627819929     |
|       | HFD-3          | 7188.012  | 14679.598      | 0.489660003          | 2.960656387     |
|       | HFD + RA 50-1  | 5077.891  | 14578.82       | 0.348306036          | 2.105980646     |
|       | HFD + RA 50-2  | 7260.598  | 12833.234      | 0.565765262          | 3.420815519     |
|       | HFD + RA 50-3  | 5750.305  | 15158.134      | 0.379354411          | 2.293710031     |
|       | HFD + RA 100-1 | 17485.062 | 19553.062      | 0.894236514          | 5.406868093     |
|       | HFD + RA 100-2 | 13386.062 | 16185.891      | 0.827020397          | 5.000455838     |
|       | HFD + RA 100-3 | 12229.477 | 17896.255      | 0.683353975          | 4.131798186     |
|       | HFD + ME 100-1 | 7625.477  | 17720.548      | 0.430318351          | 2.601855915     |
|       | HFD + ME 100-2 | 5017.77   | 18841.012      | 0.266321682          | 1.610274441     |
|       | HFD + ME 100-3 | 7028.062  | 17593.255      | 0.399474799          | 2.415364961     |
|       |                |           |                |                      |                 |
|       | Ave. of ND-3&4 |           |                | 0.158243734          | 1               |
|       | ND-3           | 2043.627  | 13350.891      | 0.153070458          | 0.967308176     |
|       | ND-4           | 2072.062  | 12679.598      | 0.163417011          | 1.032691824     |
|       | HFD-4          | 5669.012  | 13429.477      | 0.422132001          | 2.667606418     |
|       | HFD-5          | 5944.184  | 18223.77       | 0.326177514          | 2.061234941     |
|       | HFD-6          | 6985.598  | 18679.598      | 0.373969397          | 2.363249317     |
|       | HFD + RA 50-4  | 9366.598  | 14578.82       | 0.642479844          | 4.060064982     |
|       | HFD + RA 50-5  | 6983.598  | 12833.234      | 0.54418068           | 3.43887663      |
|       | HFD + RA 50-6  | 10135.719 | 15158.134      | 0.668665352          | 4.225540775     |



|  |                       |           |           |             |             |
|--|-----------------------|-----------|-----------|-------------|-------------|
|  | <b>HFD + RA 100-4</b> | 15265.891 | 14553.062 | 1.048981376 | 6.628896751 |
|  | <b>HFD + RA 100-5</b> | 14677.719 | 16185.891 | 0.906821812 | 5.7305385   |
|  | <b>HFD + RA 100-6</b> | 11485.012 | 17896.255 | 0.641755049 | 4.055484735 |
|  | <b>HFD + ME 100-4</b> | 10989.305 | 17720.548 | 0.620144761 | 3.918921426 |
|  | <b>HFD + ME 100-5</b> | 12677.305 | 18841.012 | 0.672856904 | 4.252028726 |
|  | <b>HFD + ME 100-6</b> | 10561.891 | 17593.255 | 0.600337516 | 3.793752204 |

**<Table S6: Summary of relative protein levels of Figure 4B>**

| <b>ABCA1/<math>\beta</math>-actin</b> | <b>ND</b>     | <b>HFD</b>    | <b>HFD + RA 50</b> | <b>HFD+ RA 100</b> | <b>HFD + ME 100</b> |
|---------------------------------------|---------------|---------------|--------------------|--------------------|---------------------|
| n=1                                   | 1.280585177   | 1.300687444   | 2.105980646        | 5.406868093        | 2.601855915         |
| n=2                                   | 0.719414823   | 2.627819929   | 3.420815519        | 5.000455838        | 1.610274441         |
| n=3                                   | 0.967308176   | 2.960656387   | 2.293710031        | 4.131798186        | 2.415364961         |
| n=4                                   | 1.032691824   | 2.667606418   | 4.060064982        | 6.628896751        | 3.918921426         |
| n=5                                   |               | 2.061234941   | 3.43887663         | 5.7305385          | 4.252028726         |
| n=6                                   |               | 2.363249317   | 4.225540775        | 4.055484735        | 3.793752204         |
| <b>Mean</b>                           | <b>1</b>      | <b>2.33</b>   | <b>3.257</b>       | <b>5.159</b>       | <b>3.099</b>        |
| <b>Std. Deviation</b>                 | <b>0.2306</b> | <b>0.5888</b> | <b>0.8827</b>      | <b>0.9846</b>      | <b>1.041</b>        |

**<Table S7: Intensity ratios of Western blots for Figure 4C>**

|              | Group                     | ABCG5     | $\beta$ -actin | ABCG5/ $\beta$ -actin | fold of control |
|--------------|---------------------------|-----------|----------------|-----------------------|-----------------|
| <b>ABCG5</b> | <b>Ave. of ND-1&amp;2</b> |           |                | 0.853973742           | 1               |
|              | <b>ND-1</b>               | 17525.305 | 20421.548      | 0.858177108           | 1.004922126     |
|              | <b>ND-2</b>               | 17182.719 | 20220.426      | 0.849770376           | 0.995077874     |
|              | <b>HFD-1</b>              | 6773.305  | 19011.134      | 0.356280956           | 0.417203643     |
|              | <b>HFD-2</b>              | 4900.841  | 18172.255      | 0.269688104           | 0.315803743     |
|              | <b>HFD-3</b>              | 5367.719  | 17969.134      | 0.298718848           | 0.349798633     |
|              | <b>HFD + RA 50-1</b>      | 12394.012 | 19242.548      | 0.644094119           | 0.754231761     |
|              | <b>HFD + RA 50-2</b>      | 9160.305  | 19499.033      | 0.469782527           | 0.550113551     |
|              | <b>HFD + RA 50-3</b>      | 15041.548 | 18938.326      | 0.794238519           | 0.930050282     |
|              | <b>HFD + RA 100-1</b>     | 13681.962 | 19260.255      | 0.710372838           | 0.831843888     |
|              | <b>HFD + RA 100-2</b>     | 15574.962 | 19461.841      | 0.800282049           | 0.937127233     |
|              | <b>HFD + RA 100-3</b>     | 16032.426 | 18663.326      | 0.859033701           | 1.005925193     |
|              | <b>HFD + ME 100-1</b>     | 5725.598  | 18038.74       | 0.31740565            | 0.371680808     |
|              | <b>HFD + ME 100-2</b>     | 4132.891  | 15688.912      | 0.263427509           | 0.308472609     |
|              | <b>HFD + ME 100-3</b>     | 10173.598 | 17915.012      | 0.567881171           | 0.664986689     |
|              |                           |           |                |                       |                 |
|              | <b>Ave. of ND-3&amp;4</b> |           |                | 0.793541182           | 1               |
|              | <b>ND-3</b>               | 17588.719 | 18607.154      | 0.945266482           | 1.191200285     |
|              | <b>ND-4</b>               | 11330.891 | 17654.426      | 0.641815882           | 0.808799715     |
|              | <b>HFD-4</b>              | 8827.598  | 20602.134      | 0.428479788           | 0.539959106     |
|              | <b>HFD-5</b>              | 8523.134  | 18803.134      | 0.453282628           | 0.571215002     |
|              | <b>HFD-6</b>              | 4469.477  | 19568.134      | 0.228405887           | 0.28783117      |
|              | <b>HFD + RA 50-4</b>      | 13381.426 | 17702.355      | 0.755912194           | 0.952580925     |
|              | <b>HFD + RA 50-5</b>      | 12875.255 | 22540.255      | 0.571211595           | 0.719826025     |
|              | <b>HFD + RA 50-6</b>      | 10002.841 | 19877.548      | 0.503223084           | 0.634148668     |

|  |                       |           |           |             |             |
|--|-----------------------|-----------|-----------|-------------|-------------|
|  | <b>HFD + RA 100-4</b> | 9265.305  | 16423.548 | 0.564147589 | 0.710924148 |
|  | <b>HFD + RA 100-5</b> | 14264.134 | 16734.447 | 0.852381558 | 1.074149114 |
|  | <b>HFD + RA 100-6</b> | 17356.426 | 18221.376 | 0.952531027 | 1.200354876 |
|  | <b>HFD + ME 100-4</b> | 7468.962  | 16462.205 | 0.45370362  | 0.571745525 |
|  | <b>HFD + ME 100-5</b> | 3995.77   | 15685.355 | 0.25474527  | 0.321023377 |
|  | <b>HFD + ME 100-6</b> | 4026.477  | 15138.305 | 0.265979381 | 0.335180313 |

**<Table S8: Summary of relative protein levels of Figure 4C>**

| <b>ABCG5/β-actin</b>  | <b>ND</b>     | <b>HFD</b>    | <b>HFD + RA 50</b> | <b>HFD+ RA 100</b> | <b>HFD + ME 100</b> |
|-----------------------|---------------|---------------|--------------------|--------------------|---------------------|
| n=1                   | 1.004922126   | 0.417203643   | 0.754231761        | 0.831843888        | 0.371680808         |
| n=2                   | 0.995077874   | 0.315803743   | 0.550113551        | 0.937127233        | 0.308472609         |
| n=3                   | 1.191200285   | 0.349798633   | 0.930050282        | 1.005925193        | 0.664986689         |
| n=4                   | 0.808799715   | 0.539959106   | 0.952580925        | 0.710924148        | 0.571745525         |
| n=5                   |               | 0.571215002   | 0.719826025        | 1.074149114        | 0.321023377         |
| n=6                   |               | 0.28783117    | 0.634148668        | 1.200354876        | 0.335180313         |
| <b>Mean</b>           | <b>1</b>      | <b>0.4136</b> | <b>0.7568</b>      | <b>0.9601</b>      | <b>0.4288</b>       |
| <b>Std. Deviation</b> | <b>0.1562</b> | <b>0.1186</b> | <b>0.1597</b>      | <b>0.1743</b>      | <b>0.1512</b>       |

**<Table S9: Intensity ratios of Western blots for Figure 4D>**

|       | Group          | ABCG8     | $\beta$ -actin | ABCG8/ $\beta$ -actin | fold of control |
|-------|----------------|-----------|----------------|-----------------------|-----------------|
| ABCG8 | Ave. of ND-1&2 |           |                | 0.287412796           | 1               |
|       | ND-1           | 3372.335  | 16429.225      | 0.205264399           | 0.714179751     |
|       | ND-2           | 5971.77   | 16159.083      | 0.369561194           | 1.285820249     |
|       | HFD-1          | 3180.062  | 16374.77       | 0.194204987           | 0.675700559     |
|       | HFD-2          | 5241.426  | 16067.184      | 0.32621933            | 1.135020201     |
|       | HFD-3          | 4459.891  | 17401.426      | 0.25629457            | 0.891729852     |
|       | HFD + RA 50-1  | 6710.134  | 18015.79       | 0.372458493           | 1.295900872     |
|       | HFD + RA 50-2  | 6775.962  | 16266.376      | 0.416562484           | 1.449352603     |
|       | HFD + RA 50-3  | 6933.355  | 17201.154      | 0.403074991           | 1.402425349     |
|       | HFD + RA 100-1 | 14663.841 | 17744.326      | 0.826396055           | 2.875293185     |
|       | HFD + RA 100-2 | 9392.184  | 15273.033      | 0.614952119           | 2.139612871     |
|       | HFD + RA 100-3 | 11244.841 | 16900.326      | 0.665362372           | 2.315006084     |
|       | HFD + ME 100-1 | 13661.598 | 17744.326      | 0.769913605           | 2.678772882     |
|       | HFD + ME 100-2 | 18213.719 | 19773.033      | 0.921139362           | 3.204935109     |
|       | HFD + ME 100-3 | 7957.891  | 17900.326      | 0.44456682            | 1.54678854      |
|       |                |           |                |                       |                 |
|       | Ave. of ND-3&4 |           |                | 0.30698595            | 1               |
|       | ND-3           | 3113.627  | 16596.548      | 0.187606905           | 0.611125378     |
|       | ND-4           | 6316.426  | 14814.598      | 0.426364995           | 1.388874622     |
|       | HFD-4          | 2588.477  | 17714.184      | 0.146124541           | 0.475997487     |
|       | HFD-5          | 4533.012  | 11760.77       | 0.385434967           | 1.255545954     |
|       | HFD-6          | 4542.134  | 14077.426      | 0.322653729           | 1.051037449     |
|       | HFD + RA 50-4  | 3811.062  | 12840.719      | 0.296795063           | 0.966803409     |
|       | HFD + RA 50-5  | 8297.426  | 15838.497      | 0.523877108           | 1.706518191     |
|       | HFD + RA 50-6  | 4166.477  | 19337.205      | 0.215464282           | 0.701870175     |

|  |                       |           |           |             |             |
|--|-----------------------|-----------|-----------|-------------|-------------|
|  | <b>HFD + RA 100-4</b> | 6408.719  | 15647.305 | 0.409573342 | 1.33417618  |
|  | <b>HFD + RA 100-5</b> | 10542.598 | 15168.77  | 0.695019965 | 2.264012297 |
|  | <b>HFD + RA 100-6</b> | 18184.891 | 19017.184 | 0.956234688 | 3.114913527 |
|  | <b>HFD + ME 100-4</b> | 11524.719 | 17289.305 | 0.666580814 | 2.171372385 |
|  | <b>HFD + ME 100-5</b> | 15481.548 | 18773.82  | 0.824634944 | 2.686230247 |
|  | <b>HFD + ME 100-6</b> | 17491.255 | 22007.326 | 0.79479238  | 2.589018749 |

**<Table S10: Summary of relative protein levels of Figure 4D>**

| <b>ABCG8/<math>\beta</math>-actin</b> | <b>ND</b>     | <b>HFD</b>    | <b>HFD + RA 50</b> | <b>HFD+ RA 100</b> | <b>HFD + ME 100</b> |
|---------------------------------------|---------------|---------------|--------------------|--------------------|---------------------|
| n=1                                   | 0.714179751   | 0.675700559   | 1.295900872        | 2.875293185        | 2.678772882         |
| n=2                                   | 1.285820249   | 1.135020201   | 1.449352603        | 2.139612871        | 3.204935109         |
| n=3                                   | 0.611125378   | 0.891729852   | 1.402425349        | 2.315006084        | 1.54678854          |
| n=4                                   | 1.388874622   | 0.475997487   | 0.966803409        | 1.33417618         | 2.171372385         |
| n=5                                   |               | 1.255545954   | 1.706518191        | 2.264012297        | 2.686230247         |
| n=6                                   |               | 1.051037449   | 0.701870175        | 3.114913527        | 2.589018749         |
| <b>Mean</b>                           | <b>1</b>      | <b>0.9142</b> | <b>1.254</b>       | <b>2.341</b>       | <b>2.48</b>         |
| <b>Std. Deviation</b>                 | <b>0.3941</b> | <b>0.2944</b> | <b>0.3617</b>      | <b>0.6237</b>      | <b>0.5631</b>       |

**<Table S11: Intensity ratios of Western blots for Figure 4F>**

|               | Group                     | CYP7A1    | $\beta$ -actin | CYP7A1/ $\beta$ -actin | fold of control |
|---------------|---------------------------|-----------|----------------|------------------------|-----------------|
| <b>CYP7A1</b> | <b>Ave. of ND-1&amp;2</b> |           |                | 0.32099641             | 1               |
|               | <b>ND-1</b>               | 6498.305  | 20421.548      | 0.318208247            | 0.991314037     |
|               | <b>ND-2</b>               | 6547.062  | 20220.426      | 0.323784573            | 1.008685963     |
|               | <b>HFD-1</b>              | 6547.062  | 19011.134      | 0.344380404            | 1.072848146     |
|               | <b>HFD-2</b>              | 5624.012  | 18172.255      | 0.309483441            | 0.96413365      |
|               | <b>HFD-3</b>              | 3216.648  | 17969.134      | 0.179009628            | 0.55766863      |
|               | <b>HFD + RA 50-1</b>      | 12499.134 | 19242.548      | 0.649557117            | 2.023565049     |
|               | <b>HFD + RA 50-2</b>      | 12582.184 | 19499.033      | 0.645272204            | 2.010216262     |
|               | <b>HFD + RA 50-3</b>      | 9073.77   | 18938.326      | 0.479122072            | 1.492608817     |
|               | <b>HFD + RA 100-1</b>     | 17081.255 | 19260.255      | 0.886865465            | 2.762851659     |
|               | <b>HFD + RA 100-2</b>     | 17119.841 | 19461.841      | 0.87966195             | 2.740410552     |
|               | <b>HFD + RA 100-3</b>     | 13494.426 | 18663.326      | 0.723045078            | 2.252502067     |
|               | <b>HFD + ME 100-1</b>     | 10990.598 | 18038.74       | 0.609277477            | 1.898081903     |
|               | <b>HFD + ME 100-2</b>     | 6581.012  | 15688.912      | 0.419468985            | 1.306771578     |
|               | <b>HFD + ME 100-3</b>     | 10472.719 | 17915.012      | 0.584577839            | 1.821135129     |
|               |                           |           |                |                        |                 |
|               | <b>Ave. of ND-3&amp;4</b> |           |                | 0.367415404            | 1               |
|               | <b>ND-3</b>               | 5595.941  | 16122.305      | 0.347093111            | 0.944688512     |
|               | <b>ND-4</b>               | 6136.134  | 15825.477      | 0.387737697            | 1.055311488     |
|               | <b>HFD-4</b>              | 5906.598  | 16644.891      | 0.354859518            | 0.965826458     |
|               | <b>HFD-5</b>              | 10567.134 | 17516.598      | 0.603264058            | 1.641912811     |
|               | <b>HFD-6</b>              | 9770.548  | 18280.598      | 0.534476389            | 1.454692381     |
|               | <b>HFD + RA 50-4</b>      | 11569.255 | 18159.598      | 0.637087616            | 1.733970894     |
|               | <b>HFD + RA 50-5</b>      | 14532.669 | 17073.305      | 0.85119249             | 2.316703332     |
|               | <b>HFD + RA 50-6</b>      | 12882.305 | 19669.012      | 0.654954352            | 1.782599055     |

|  |                       |           |           |             |             |
|--|-----------------------|-----------|-----------|-------------|-------------|
|  | <b>HFD + RA 100-4</b> | 9283.012  | 10217.598 | 0.908531731 | 2.472764402 |
|  | <b>HFD + RA 100-5</b> | 17920.305 | 16607.891 | 1.07902352  | 2.936794452 |
|  | <b>HFD + RA 100-6</b> | 21180.255 | 18046.134 | 1.17367271  | 3.19440257  |
|  | <b>HFD + ME 100-4</b> | 14242.719 | 16762.619 | 0.849671462 | 2.312563528 |
|  | <b>HFD + ME 100-5</b> | 14025.548 | 15660.033 | 0.895626976 | 2.437641336 |
|  | <b>HFD + ME 100-6</b> | 14280.113 | 17813.619 | 0.801640195 | 2.181836107 |

**<Table S12: Summary of relative protein levels of Figure 4F>**

| <b>CYP7A1/<math>\beta</math>-actin</b> | <b>ND</b>      | <b>HFD</b>    | <b>HFD + RA 50</b> | <b>HFD+ RA 100</b> | <b>HFD + ME 100</b> |
|----------------------------------------|----------------|---------------|--------------------|--------------------|---------------------|
| n=1                                    | 0.991314037    | 1.072848146   | 2.023565049        | 2.762851659        | 1.898081903         |
| n=2                                    | 1.008685963    | 0.96413365    | 2.010216262        | 2.740410552        | 1.306771578         |
| n=3                                    | 0.944688512    | 0.55766863    | 1.492608817        | 2.252502067        | 1.821135129         |
| n=4                                    | 1.055311488    | 0.965826458   | 1.733970894        | 2.472764402        | 2.312563528         |
| n=5                                    |                | 1.641912811   | 2.316703332        | 2.936794452        | 2.437641336         |
| n=6                                    |                | 1.454692381   | 1.782599055        | 3.19440257         | 2.181836107         |
| <b>Mean</b>                            | <b>1</b>       | <b>1.11</b>   | <b>1.893</b>       | <b>2.727</b>       | <b>1.993</b>        |
| <b>Std. Deviation</b>                  | <b>0.04572</b> | <b>0.3874</b> | <b>0.2857</b>      | <b>0.3328</b>      | <b>0.4111</b>       |

**<Table S13: Intensity ratios of Western blots for Figure 5B>**

|              | Group                     | pAMPK $\alpha$ | AMPK $\alpha$ | pAMPK $\alpha$ /AMPK $\alpha$ | fold of control |
|--------------|---------------------------|----------------|---------------|-------------------------------|-----------------|
|              | Ave. of ND-1&2            |                |               | 0.912595028                   | 1               |
| <b>pAMPK</b> | <b>ND-1</b>               | 14751.719      | 15863.184     | 0.929934306                   | 1.01899997      |
|              | <b>ND-2</b>               | 13459.548      | 15034.305     | 0.89525575                    | 0.98100003      |
|              | <b>HFD-1</b>              | 3756.477       | 16796.305     | 0.223649011                   | 0.245069285     |
|              | <b>HFD-2</b>              | 6476.841       | 16086.012     | 0.402638081                   | 0.441201265     |
|              | <b>HFD-3</b>              | 5857.305       | 15884.012     | 0.368754758                   | 0.404072723     |
|              | <b>HFD + RA 50-1</b>      | 8836.477       | 14075.184     | 0.627805434                   | 0.687934313     |
|              | <b>HFD + RA 50-2</b>      | 16297.548      | 17679.184     | 0.92184956                    | 1.010140897     |
|              | <b>HFD + RA 50-3</b>      | 14962.012      | 18748.669     | 0.798030623                   | 0.874463041     |
|              | <b>HFD + RA 100-1</b>     | 14877.184      | 12425.426     | 1.197317822                   | 1.311992489     |
|              | <b>HFD + RA 100-2</b>     | 14413.598      | 15899.012     | 0.90657193                    | 0.993400032     |
|              | <b>HFD + RA 100-3</b>     | 17098.548      | 14521.134     | 1.177493989                   | 1.290270003     |
|              | <b>HFD + ME 100-1</b>     | 8250.598       | 11862.477     | 0.695520674                   | 0.762135069     |
|              | <b>HFD + ME 100-2</b>     | 17431.255      | 16384.891     | 1.063861517                   | 1.165754234     |
|              | <b>HFD + ME 100-3</b>     | 17751.012      | 15436.134     | 1.149964881                   | 1.260104259     |
|              |                           |                |               |                               |                 |
|              | <b>Ave. of ND-3&amp;4</b> |                |               | 0.885696849                   | 1               |
|              | <b>ND-3</b>               | 13315.305      | 13317.184     | 0.999858904                   | 1.12889518      |
|              | <b>ND-4</b>               | 6531.184       | 8465.184      | 0.771534795                   | 0.87110482      |
|              | <b>HFD-4</b>              | 2898.012       | 14914.184     | 0.194312475                   | 0.219389371     |
|              | <b>HFD-5</b>              | 6593.841       | 15223.77      | 0.433127997                   | 0.489025107     |
|              | <b>HFD-6</b>              | 7387.134       | 14263.477     | 0.517905557                   | 0.584743592     |
|              | <b>HFD + RA 50-4</b>      | 9496.598       | 17223.548     | 0.551372923                   | 0.622530071     |
|              | <b>HFD + RA 50-5</b>      | 15162.255      | 19151.548     | 0.791698666                   | 0.893870929     |
|              | <b>HFD + RA 50-6</b>      | 11040.134      | 20563.376     | 0.536883341                   | 0.606170543     |



|  |                       |           |           |             |             |
|--|-----------------------|-----------|-----------|-------------|-------------|
|  | <b>HFD + RA 100-4</b> | 10209.134 | 17481.891 | 0.583983392 | 0.659349067 |
|  | <b>HFD + RA 100-5</b> | 17561.962 | 15558.426 | 1.12877498  | 1.274448454 |
|  | <b>HFD + RA 100-6</b> | 16893.669 | 18399.841 | 0.918142119 | 1.036632477 |
|  | <b>HFD + ME 100-4</b> | 8210      | 13625.255 | 0.60255753  | 0.680320282 |
|  | <b>HFD + ME 100-5</b> | 18758.962 | 15546.77  | 1.20661475  | 1.362333795 |
|  | <b>HFD + ME 100-6</b> | 16659.598 | 12798.355 | 1.301698382 | 1.469688396 |

**<Table S14: Summary of relative protein levels of Figure 5B>**

| <b>pAMPKα/AMPKα</b>   | <b>ND</b>     | <b>HFD</b>    | <b>HFD + RA 50</b> | <b>HFD+ RA 100</b> | <b>HFD + ME 100</b> |
|-----------------------|---------------|---------------|--------------------|--------------------|---------------------|
| n=1                   | 1.01899997    | 0.245069285   | 0.687934313        | 1.311992489        | 0.762135069         |
| n=2                   | 0.98100003    | 0.441201265   | 1.010140897        | 0.993400032        | 1.165754234         |
| n=3                   | 1.128895      | 0.404072723   | 0.874463041        | 1.290270003        | 1.260104259         |
| n=4                   | 0.871105      | 0.219389371   | 0.622530071        | 0.659349067        | 0.680320282         |
| n=5                   |               | 0.489025107   | 0.893870929        | 1.274448454        | 1.362333795         |
| n=6                   |               | 0.584743592   | 0.606170543        | 1.036632477        | 1.469688396         |
| <b>Mean</b>           | <b>1</b>      | <b>0.3973</b> | <b>0.7825</b>      | <b>1.094</b>       | <b>1.117</b>        |
| <b>Std. Deviation</b> | <b>0.1064</b> | <b>0.1417</b> | <b>0.1663</b>      | <b>0.2534</b>      | <b>0.3237</b>       |

**<Table S15: Intensity ratios of Western blots for Figure 5D>**

|              | Group                     | CPT1A     | $\beta$ -actin | CPT1A/ $\beta$ -actin | fold of control |
|--------------|---------------------------|-----------|----------------|-----------------------|-----------------|
| <b>CPT1A</b> | <b>Ave. of ND-1&amp;2</b> |           |                | 0.301682851           | 1               |
|              | <b>ND-1</b>               | 3479.598  | 11083.548      | 0.313942611           | 1.040637908     |
|              | <b>ND-2</b>               | 3927.355  | 13569.598      | 0.289423091           | 0.959362092     |
|              | <b>HFD-1</b>              | 4970.062  | 14061.305      | 0.353456667           | 1.171616702     |
|              | <b>HFD-2</b>              | 5886.062  | 14334.062      | 0.410634613           | 1.361146685     |
|              | <b>HFD-3</b>              | 7190.184  | 18768.184      | 0.38310494            | 1.269892996     |
|              | <b>HFD + RA 50-1</b>      | 8809.012  | 18995.941      | 0.463731278           | 1.537148288     |
|              | <b>HFD + RA 50-2</b>      | 9394.234  | 19057.548      | 0.49294033            | 1.633968679     |
|              | <b>HFD + RA 50-3</b>      | 13073.548 | 21672.891      | 0.603221232           | 1.999521117     |
|              | <b>HFD + RA 100-1</b>     | 13209.426 | 18070.841      | 0.730980146           | 2.423008612     |
|              | <b>HFD + RA 100-2</b>     | 15994.255 | 19071.841      | 0.838631939           | 2.779846238     |
|              | <b>HFD + RA 100-3</b>     | 16766.184 | 18014.062      | 0.930727562           | 3.085119217     |
|              | <b>HFD + ME 100-1</b>     | 9239.062  | 18876.426      | 0.489449751           | 1.622398319     |
|              | <b>HFD + ME 100-2</b>     | 17868.598 | 18527.477      | 0.964437738           | 3.196859661     |
|              | <b>HFD + ME 100-3</b>     | 18574.426 | 18263.477      | 1.017025728           | 3.371175141     |
|              |                           |           |                |                       |                 |
|              | <b>Ave. of ND-3&amp;4</b> |           |                | 0.309472812           | 1               |
|              | <b>ND-3</b>               | 4880.062  | 15472.912      | 0.315393896           | 1.01913281      |
|              | <b>ND-4</b>               | 4793.426  | 15791.134      | 0.303551727           | 0.98086719      |
|              | <b>HFD-4</b>              | 3874.891  | 16714.376      | 0.231829833           | 0.749112117     |
|              | <b>HFD-5</b>              | 4455.305  | 17172.962      | 0.25943719            | 0.838319813     |
|              | <b>HFD-6</b>              | 5341.598  | 17557.255      | 0.304238789           | 0.983087294     |
|              | <b>HFD + RA 50-4</b>      | 11074.548 | 17150.669      | 0.64572105            | 2.086519481     |
|              | <b>HFD + RA 50-5</b>      | 9334.598  | 19703.518      | 0.47375286            | 1.530838387     |
|              | <b>HFD + RA 50-6</b>      | 13646.134 | 20685.347      | 0.659700512           | 2.131691337     |

|  |                       |           |           |             |             |
|--|-----------------------|-----------|-----------|-------------|-------------|
|  | <b>HFD + RA 100-4</b> | 13188.012 | 17823.347 | 0.739929038 | 2.390933905 |
|  | <b>HFD + RA 100-5</b> | 17553.134 | 17805.347 | 0.985834985 | 3.185530193 |
|  | <b>HFD + RA 100-6</b> | 10600.477 | 16254.397 | 0.652160582 | 2.107327549 |
|  | <b>HFD + ME 100-4</b> | 10501.849 | 14270.447 | 0.735915911 | 2.37796628  |
|  | <b>HFD + ME 100-5</b> | 16241.255 | 18315.326 | 0.886757626 | 2.86538136  |
|  | <b>HFD + ME 100-6</b> | 12669.77  | 17760.669 | 0.713361079 | 2.305084815 |

**<Table S16: Summary of relative protein levels of Figure 5D>**

| <b>CPT1A/<math>\beta</math>-actin</b> | <b>ND</b>      | <b>HFD</b>    | <b>HFD + RA 50</b> | <b>HFD+ RA 100</b> | <b>HFD + ME 100</b> |
|---------------------------------------|----------------|---------------|--------------------|--------------------|---------------------|
| n=1                                   | 1.040637908    | 1.171616702   | 1.537148288        | 2.423008612        | 1.622398319         |
| n=2                                   | 0.959362092    | 1.361146685   | 1.633968679        | 2.779846238        | 3.196859661         |
| n=3                                   | 1.01913281     | 1.269892996   | 1.999521117        | 3.085119217        | 3.371175141         |
| n=4                                   | 0.98086719     | 0.749112117   | 2.086519481        | 2.390933905        | 2.37796628          |
| n=5                                   |                | 0.838319813   | 1.530838387        | 3.185530193        | 2.86538136          |
| n=6                                   |                | 0.983087294   | 2.131691337        | 2.107327549        | 2.305084815         |
| <b>Mean</b>                           | <b>1</b>       | <b>1.062</b>  | <b>1.82</b>        | <b>2.662</b>       | <b>2.623</b>        |
| <b>Std. Deviation</b>                 | <b>0.03667</b> | <b>0.2445</b> | <b>0.2824</b>      | <b>0.4255</b>      | <b>0.6496</b>       |
